# Supplementary material
Source: PubMed Central journal article supplement (PMC6071498)
Supplement: jnm206961SupplementalData.pdf [file jnm206961SupplementalData.pdf]

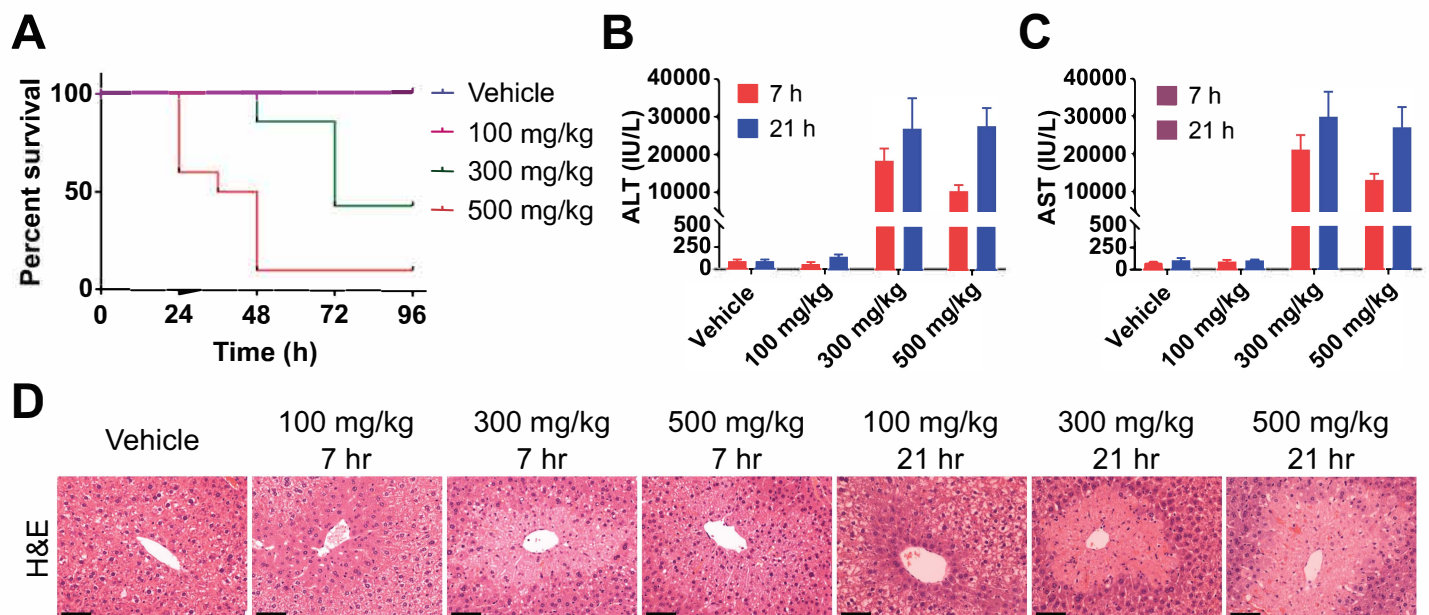

**Figure 1:** A mouse model of drug-induced liver injury. (A) A Kaplan Meier curve displaying percent survival after treating mice with saline vehicle or 100, 300, or 500 mg/kg acetaminophen. Vehicle:  $n=8$ ; 100 mg/kg:  $n=8$ ; 300 mg/kg:  $n=14$ ; 500 mg/kg:  $n=10$ . (B) Serum ALT and (C) AST values from mice treated with saline vehicle or 100, 300, or 500 mg/kg acetaminophen for 7 and 21 h. 7 hours, all doses:  $n=6$ ; 21 hours, vehicle:  $n=4$ ; 100 and 300 mg/kg:  $n=6$ ; 500 mg/kg:  $n=5$ . (D) H&E stained liver sections from mice treated with saline vehicle or 100, 300, or 500 mg/kg acetaminophen for 7 and 21 h. Scale bars represent 100 microns.

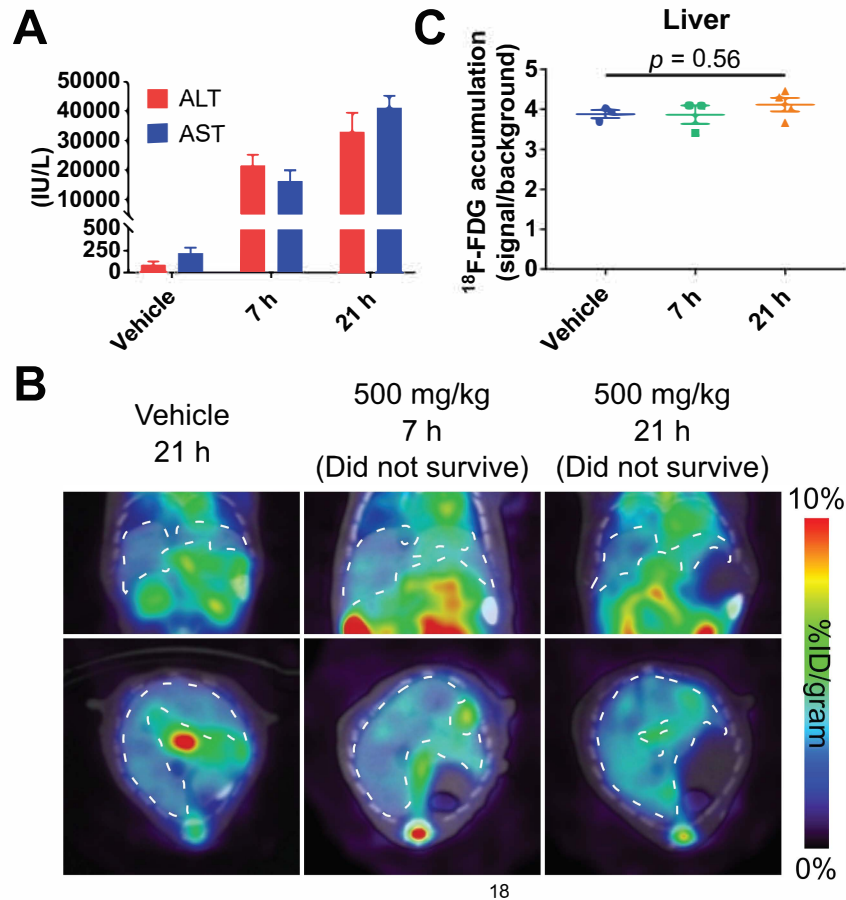

**Figure 2:** PET imaging with <sup>18</sup>F-FDG cannot distinguish vehicle-treated from high dose acetaminophen-treated mice. (A) Serum ALT and AST values from mice treated with saline vehicle or 500 mg/kg acetaminophen for 7 and 21 h. Vehicle and 7 hours: *n*=3; 21 hours: *n*=4. (B) Representative coronal and transverse <sup>18</sup>F-FDG PET images of mice treated with saline vehicle or 500 mg/kg acetaminophen for 7 and 21 h. (C) Quantification of hepatic <sup>18</sup>F-FDG PET accumulation in mice treated with saline vehicle or 500 mg/kg acetaminophen for 7 and 21 h. Vehicle and 7 hours: *n*=3; 21 hours: *n*=4. One-way ANOVA.

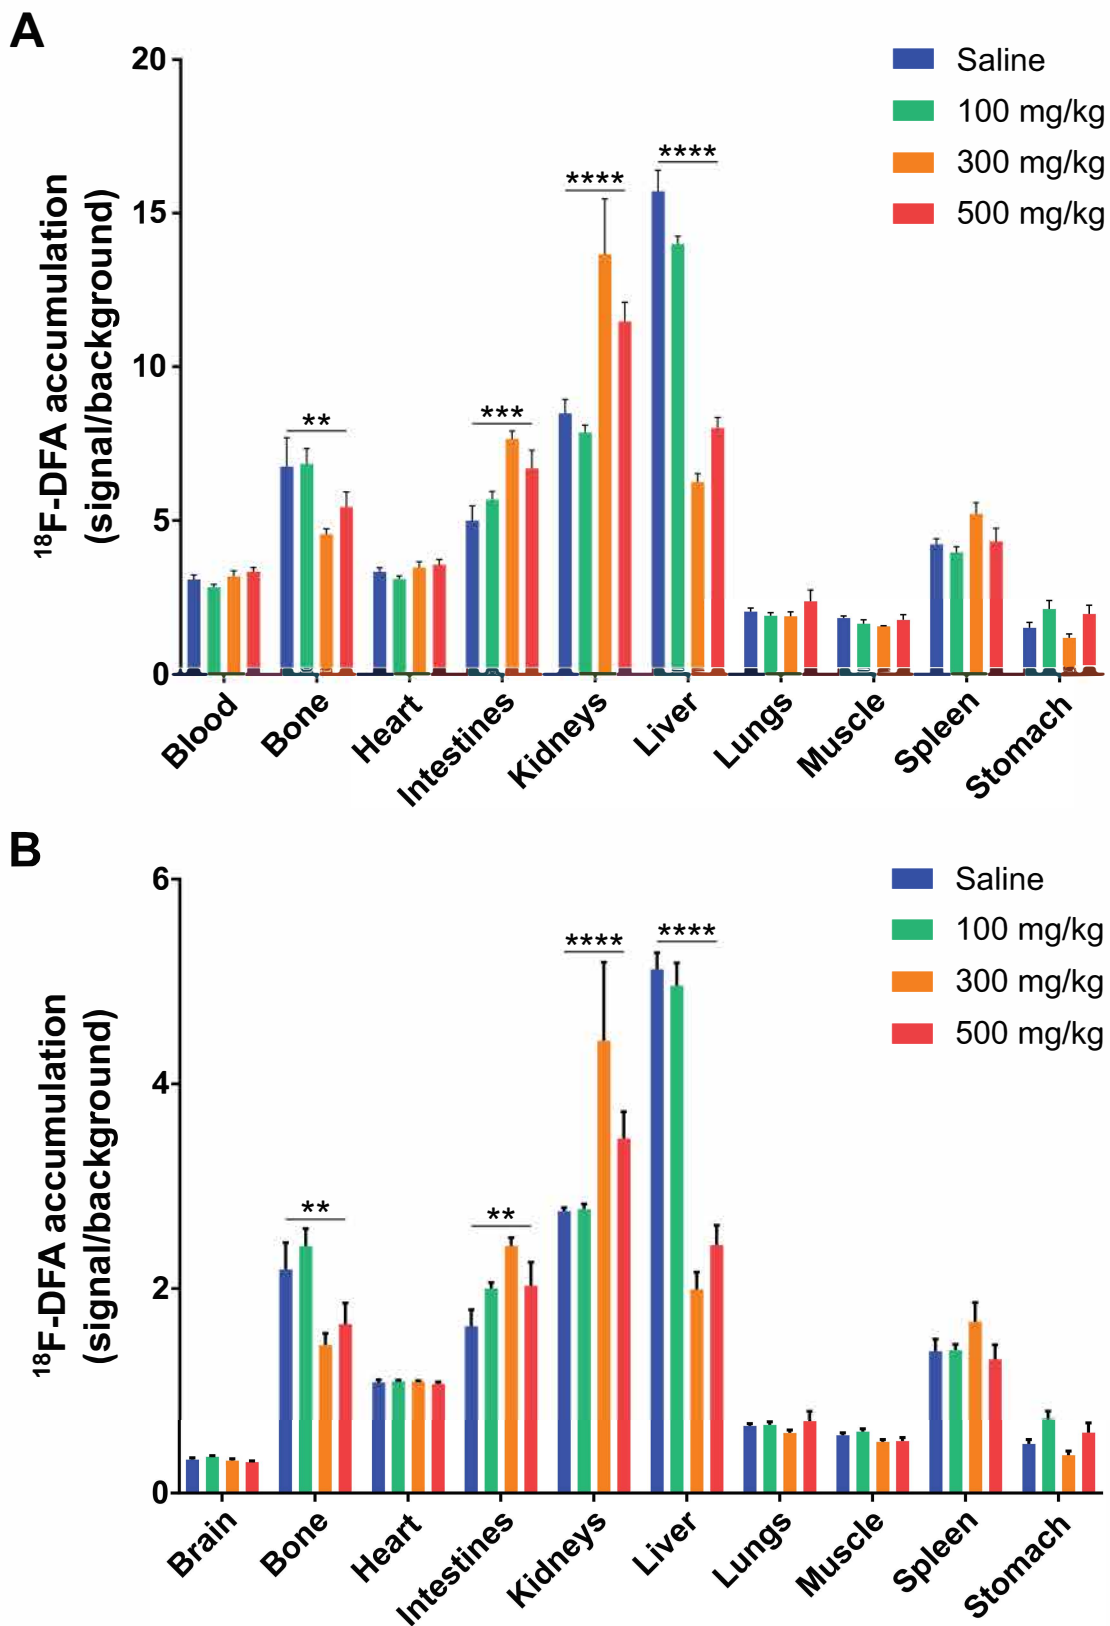

**Figure 3:** High dose (300 and 500 mg/kg) acetaminophen treatments alter the biodistribution of <sup>18</sup>F-DFA accumulation. (A) <sup>18</sup>F-DFA accumulation in various organs, normalized to brain <sup>18</sup>F-DFA accumulation. (B) <sup>18</sup>F-DFA accumulation in various organs, normalized to image-derived blood <sup>18</sup>F-DFA levels. All doses: *n*=4. Two-way ANOVA with Dunnett correction. \*\*: *p*<0.01, \*\*\*: *p*<0.001, \*\*\*\*: *p*<0.0001.

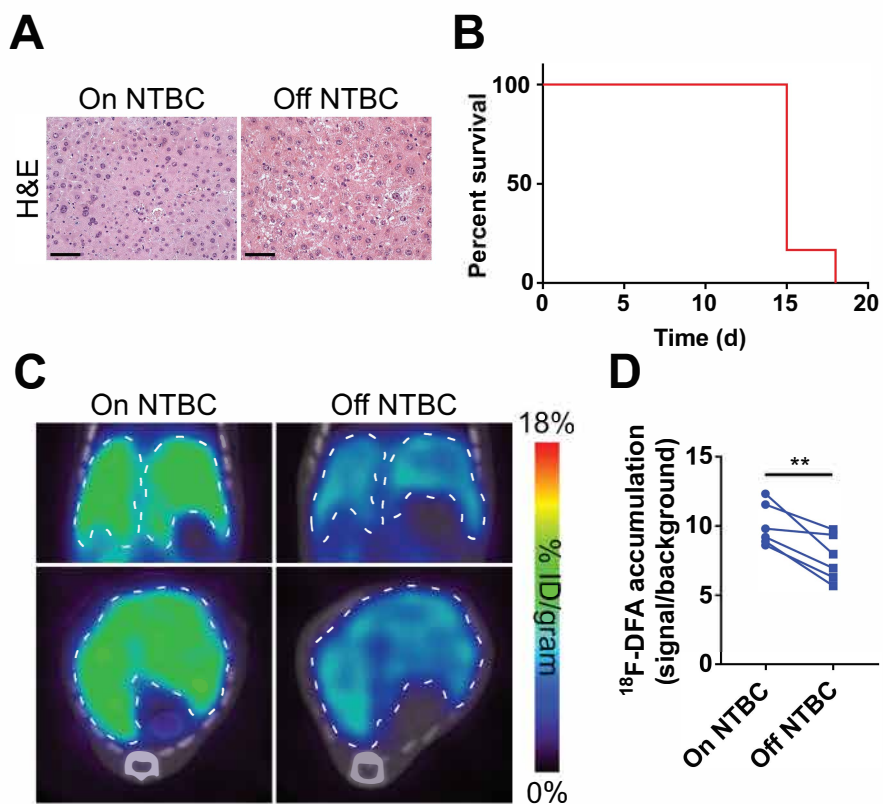

**Figure 4:** PET imaging with  $^{18}\text{F}$ -DFA can distinguish healthy mice from mice in acute liver failure induced by a toxic metabolite. (A) H&E stained liver sections from mice maintained on NTBC or withdrawn from NTBC for 2 weeks. (B) A Kaplan Meier curve displaying percent survival of FRG mice following withdrawal of NTBC. (C) Representative transverse and coronal  $^{18}\text{F}$ -DFA PET/CT images, immediately prior to and 2 weeks after withdrawal of NTBC. Dotted white lines encircle the livers. (D) Quantification of hepatic  $^{18}\text{F}$ -DFA accumulation in mice immediately prior to and 2 weeks after withdrawal of NTBC.  $n=6$ . Unpaired t test. Scale bars represent 100 microns. \*\*:  $p<0.01$ .

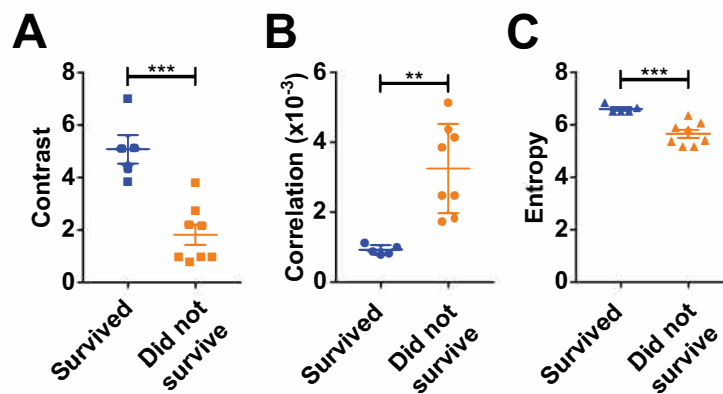

**Figure 5:** PET imaging with  $^{18}\text{F}$ -DFA 21 hours after acetaminophen treatment can distinguish mice that will survive high dose acetaminophen from mice that will not. Quantification of hepatic  $^{18}\text{F}$ -DFA (A) contrast, (B) correlation, and (C) entropy values in mice, 21 hours after treatment with high dose acetaminophen, plotted by survival status. Survived:  $n=5$ ; did not survive:  $n=8$ . Unpaired t tests. \*\*:  $p < 0.01$ ; \*\*\*:  $p < 0.001$ .

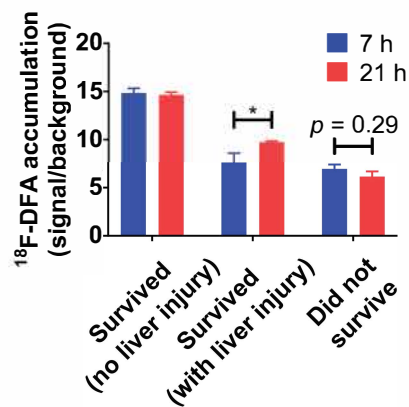

**Figure 6:** A kinetic picture of the liver responding to acetaminophen.

Tabulated hepatic  $^{18}\text{F}$ -DFA accumulation, plotted by time point and survival status. Survived (no liver injury), both time points:  $n=8$ ; survived (with liver injury) – 7 h:  $n=2$ ; 21 h:  $n=5$ ; did not survive – 7 h:  $n=6$ ; 21 h:  $n=8$ . Unpaired t tests. \*:  $p<0.05$ .
